# Supplementary material for: Aerosol properties and meteorological conditions in the city of BuenosAires, Argentina, during the resuspension of volcanic ash from thePuyehue-Cordón Caulle eruption
Source: Copernicus journal article supplement (doi:10.5194/nhess-16-2159-2016), 2016-09-27
Supplement: Supplementary file 1 [file nhess-16-2159-2016-supplement.zip]

## SUPPLEMENTARY MATERIAL CALIPSO

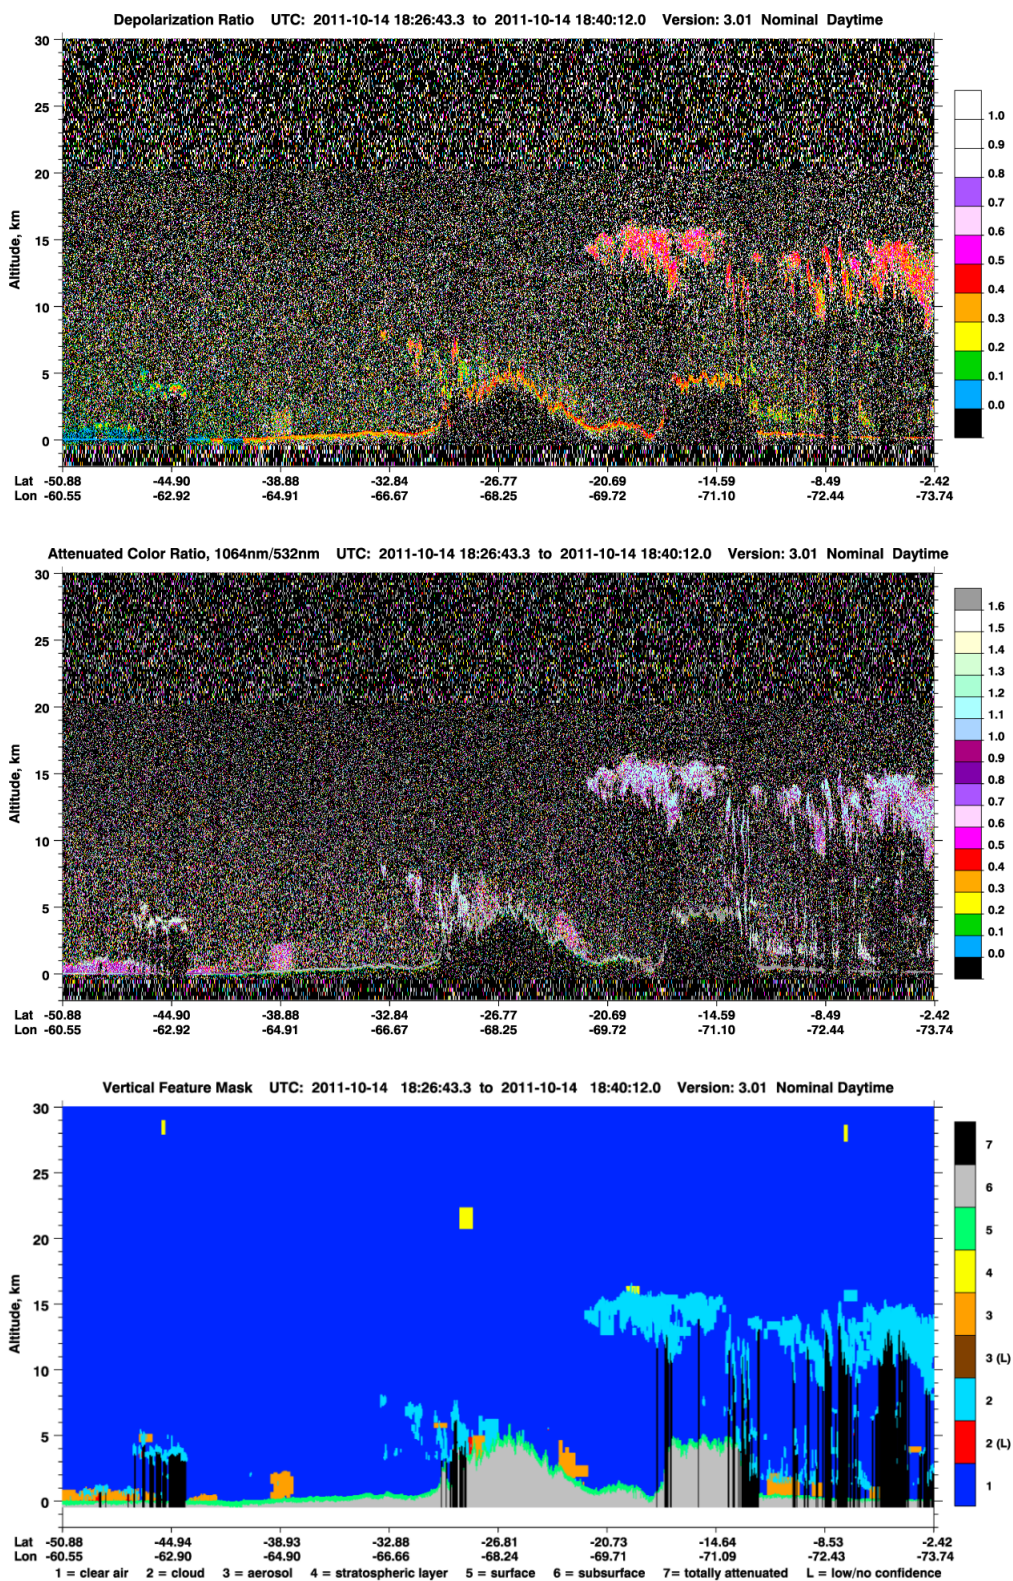

Figure I. Volume depolarization ratio (upper panel), attenuated color ratio (middle panel) and vertical feature mask (VFM) (bottom panel) from CALIOP along the track over the region of study on 14 October from 18:26:43 UTC to 18:40:12 UTC.



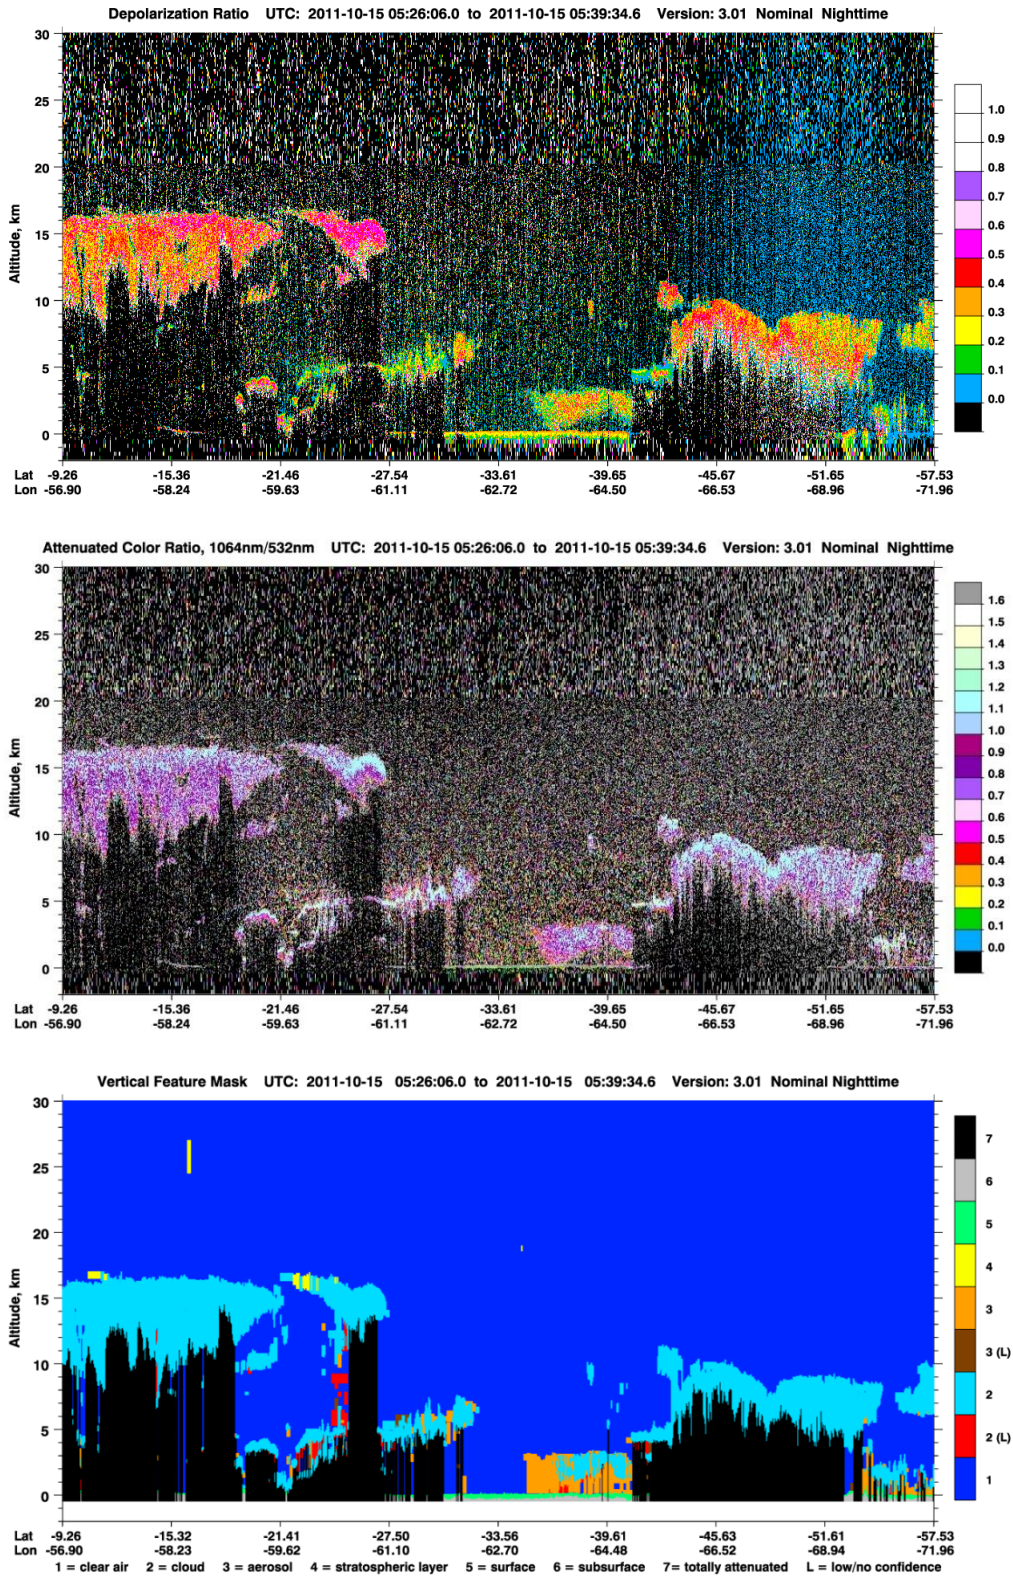

Figure II. Volume depolarization ratio (upper panel), attenuated color ratio (middle panel) and vertical feature mask (VFM) (bottom panel) from CALIOP along the track over the region of study on 15 October from 05:26:06 UTC to 05:39:34 UTC.



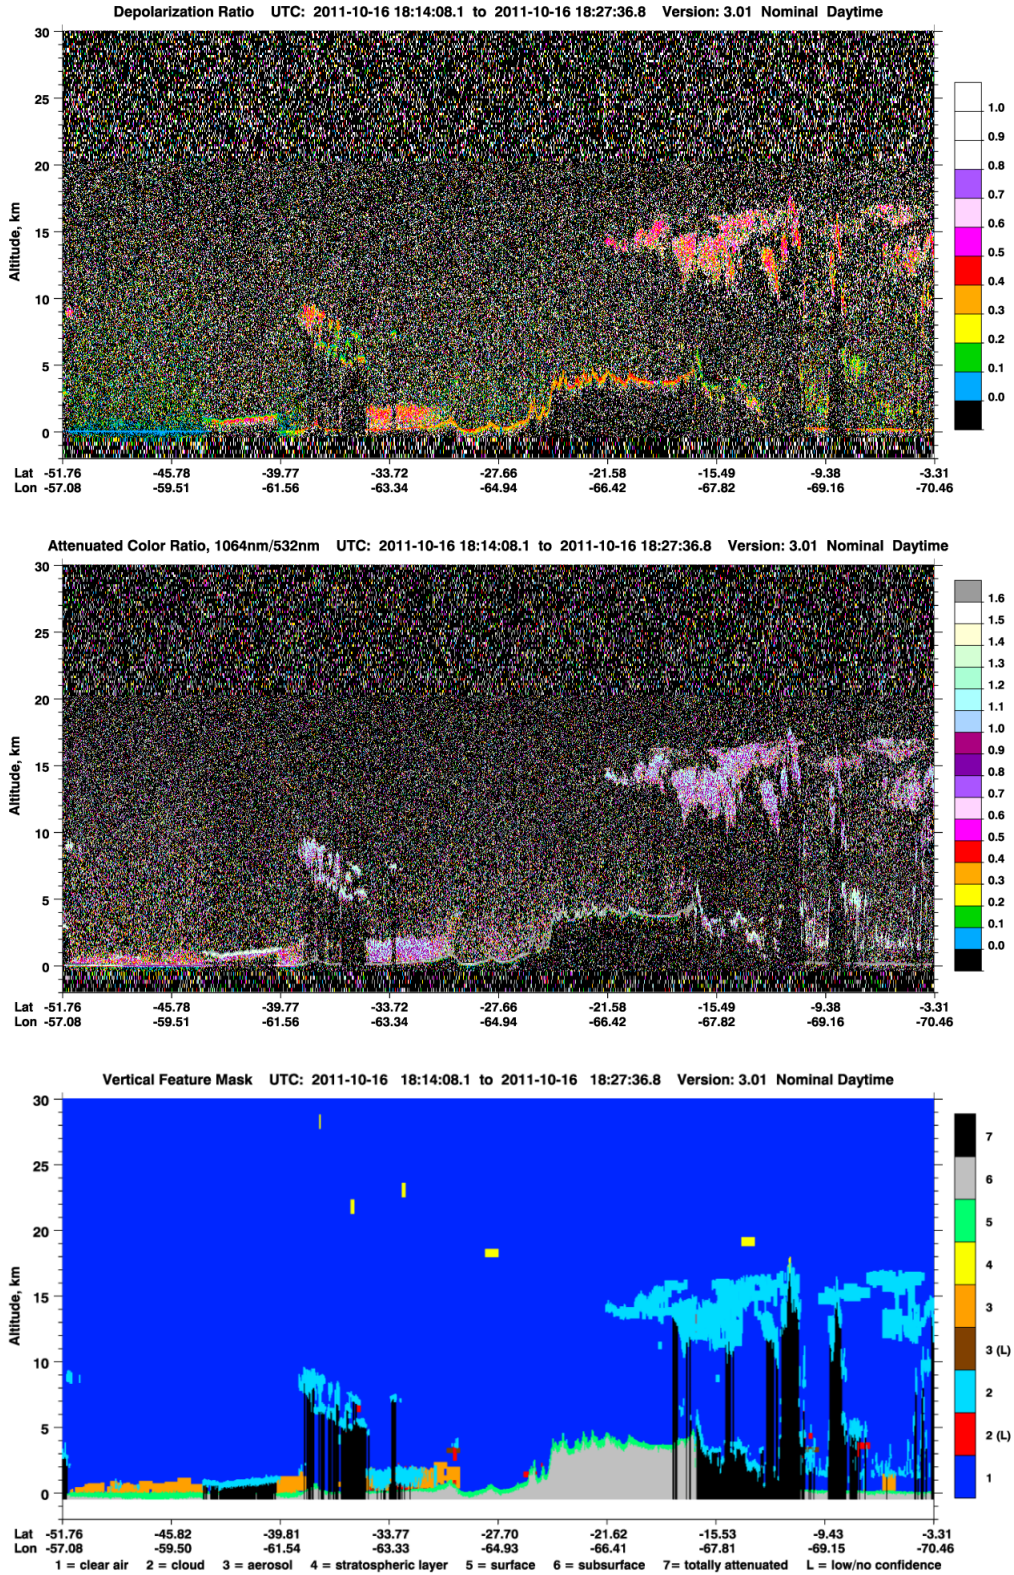

Figure III. Volume depolarization ratio (upper panel), attenuated color ratio (middle panel) and vertical feature mask (VFM) (bottom panel) from CALIOP along the track over the region of study on 16 October from 18:14:08 UTC to 18:27:36 UTC.
