# Supplementary material for: Aerosol properties and meteorological conditions in the city of BuenosAires, Argentina, during the resuspension of volcanic ash from thePuyehue-Cordón Caulle eruption
Source: Copernicus journal article supplement (doi:10.5194/nhess-16-2159-2016), 2016-09-27
Supplement: Supplementary file 3 [file nhess-16-2159-2016-supplement.zip]

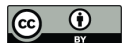

*Supplement of*

**Aerosol properties and meteorological conditions in the city of Buenos Aires, Argentina, during the resuspension of volcanic ash from the Puyehue-Cordón Caulle eruption**

Ana Graciela Ulke et al.

*Correspondence to:* Ana Graciela Ulke (anagulke@gmail.com)

- nhess-16-2159-2016-supplement-title-page.pdf
- SUPPLEMENTARY MATERIAL\_CALIPSO.pdf
- SupplementaryMaterial\_HYSPLIT.pdf

The copyright of individual parts of the supplement might differ from the CC-BY 3.0 licence.
